# Supplementary material
Source: PubMed Central journal article supplement (PMC7893240)
Supplement: rspb20202951supp1.pdf [file rspb20202951supp1.pdf]

## **Supplemental Information**

### **Additional methods and results**

The total joint success rate in the rope-pulling task was 61% with 131 successful trials over 215 total trials performed by 145 different pairs of 290 children. Only 14 dyads of children did not succeed after the three attempts. Since we children were allowed to perform up to 3 attempts, we also looked at the effect of partner relationship on the number of trials before success using an ordered logistic regression (“polr” function) with ordered responses (1: success after 1 trial; 2: success after 2 trials, 3: success after 3 trials). We built a full model that included fixed effects of dyad relationship (kin, friend, non-friend), average age of partners, age difference between the partners and sex of the dyad (male-male, female-female, male-female). Kin dyads required more trials to succeed on average compared to friends’ dyads while controlling for mean age, age difference and sex of dyads.

Table S1. Effect of dyad characteristics (partner status: Kin, Friends, Non-Friends, sex: Female-Female, Male-Male, Female-Male, mean Age, age difference) on the number of trials before success (ordered LM).

| <b>Number of trials before joint success</b> |                    |             |              |
|----------------------------------------------|--------------------|-------------|--------------|
| <i>Predictors</i>                            | <i>Odds Ratios</i> | <i>CI</i>   | <i>p</i>     |
| Partner: Friend vs. Kin                      | 0.23               | 0.08 – 0.65 | <b>0.007</b> |
| Partner: Non Friend vs. Kin                  | 0.30               | 0.11 – 0.80 | <b>0.019</b> |
| Partner: Non Friend vs. Friend               | 1.28               | 0.50 – 3.30 | 0.608        |
| Dyad mean age                                | 0.80               | 0.52 – 1.23 | 0.311        |
| Dyad age difference                          | 0.66               | 0.41 – 1.03 | 0.079        |
| Dyad sex                                     | 0.92               | 0.62 – 1.36 | 0.685        |
| Observations                                 | 131                |             |              |
| R <sup>2</sup> Nagelkerke                    | 0.102              |             |              |

*Note. The second category corresponds to the reference category.*

Table S2. Effect of dyad characteristics (partner status: Kin, Friends, Non-Friends, sex: Female-Female, Male-Male, Female-Male, mean Age, age difference) on performance in the first trials (binomial GLM).

| <i>Predictors</i>              | <b>Performance during first trials</b> |                   |              |                  |              |
|--------------------------------|----------------------------------------|-------------------|--------------|------------------|--------------|
|                                | <i>Odds Ratios</i>                     | <i>std. Error</i> | <i>CI</i>    | <i>Statistic</i> | <i>p</i>     |
| (Intercept)                    | 0.79                                   | 0.38              | 0.31 – 2.02  | -0.50            | 0.619        |
| Dyad age difference            | 1.45                                   | 0.32              | 0.95 – 2.27  | 1.70             | 0.090        |
| Partner: Friend vs. Kin        | 4.08                                   | 2.19              | 1.46 – 12.10 | 2.62             | <b>0.009</b> |
| Partner: Non friend vs. Kin    | 3.10                                   | 1.53              | 1.20 – 8.41  | 2.29             | <b>0.022</b> |
| Partner: Non friend vs. Friend | 0.76                                   | 0.34              | 0.31 – 1.83  | -0.61            | 0.542        |
| Dyad mean age                  | 1.68                                   | 0.33              | 1.15 – 2.51  | 2.64             | <b>0.008</b> |
| Dyad sex: FM vs. FF            | 0.73                                   | 0.35              | 0.28 – 1.87  | -0.65            | 0.513        |
| Dyad sex: MM vs. FF            | 0.84                                   | 0.38              | 0.35 – 2.02  | -0.38            | 0.704        |
| Dyad sex: MM vs. FM            | 1.15                                   | 0.52              | 0.47 – 2.81  | 0.32             | 0.752        |
| Observations                   | 145                                    |                   |              |                  |              |
| R <sup>2</sup> Tjur            | 0.127                                  |                   |              |                  |              |
| AIC                            | 187.393                                |                   |              |                  |              |

*Note. The second category corresponds to the reference category.*

Table S3. Effect of demographic variables on performance during first trials with “participant” as a random factor and Age in months, sex, number of siblings, parents’ income, and living area (urban vs rural) as fixed factors using binomial GLMM.

| <b>Performance during first trials</b>               |                    |                   |             |                  |              |
|------------------------------------------------------|--------------------|-------------------|-------------|------------------|--------------|
| <i>Predictors</i>                                    | <i>Odds Ratios</i> | <i>std. Error</i> | <i>CI</i>   | <i>Statistic</i> | <i>p</i>     |
| (Intercept)                                          | 1.88               | 0.39              | 1.26 – 2.82 | 3.07             | <b>0.002</b> |
| Age in months                                        | 2.07               | 0.47              | 1.32 – 3.24 | 3.19             | <b>0.001</b> |
| Sex: M vs. F                                         | 1.02               | 0.18              | 0.72 – 1.44 | 0.10             | 0.922        |
| Parents’ income                                      | 0.75               | 0.14              | 0.53 – 1.08 | -1.55            | 0.122        |
| Living area (rural=1)                                | 1.30               | 0.26              | 0.88 – 1.92 | 1.32             | 0.186        |
| Nb. Of Siblings                                      | 0.73               | 0.20              | 0.43 – 1.23 | -1.18            | 0.239        |
| <b>Random Effects</b>                                |                    |                   |             |                  |              |
| $\sigma^2$                                           | 3.29               |                   |             |                  |              |
| $\tau_{00}$ Subject                                  | 0.15               |                   |             |                  |              |
| ICC                                                  | 0.04               |                   |             |                  |              |
| N <sub>Subject</sub>                                 | 171                |                   |             |                  |              |
| Observations                                         | 172                |                   |             |                  |              |
| Marginal R <sup>2</sup> / Conditional R <sup>2</sup> | 0.133 / 0.171      |                   |             |                  |              |
| AIC                                                  | 219.348            |                   |             |                  |              |

Table S4. Effect of the number of friends on performance in the first trial (binomial GLM) while controlling for dyad characteristics (sex: Female-Female, Male-Male, Female-Male, mean age, age difference)

| <i>Predictors</i>                    | <b>Performance</b> |                   |              |                  |              |
|--------------------------------------|--------------------|-------------------|--------------|------------------|--------------|
|                                      | <i>Odds Ratios</i> | <i>std. Error</i> | <i>CI</i>    | <i>Statistic</i> | <i>p</i>     |
| (Intercept)                          | 0.14               | 0.19              | 0.01 – 1.96  | -1.43            | 0.154        |
| Dyad Mean Nb. of friends (outdegree) | 1.58               | 0.32              | 1.08 – 2.40  | 2.26             | <b>0.024</b> |
| Dyad mean age                        | 2.34               | 0.67              | 1.37 – 4.27  | 2.95             | <b>0.003</b> |
| Dyad age difference                  | 1.69               | 0.52              | 0.95 – 3.20  | 1.70             | 0.088        |
| Dyad sex: FM vs. FF                  | 0.64               | 0.42              | 0.17 – 2.30  | -0.68            | 0.496        |
| Dyad sex: MM vs. FF                  | 1.66               | 1.08              | 0.46 – 6.15  | 0.77             | 0.439        |
| Dyad sex: MM vs. FM                  | 2.59               | 1.73              | 0.72 – 10.13 | 1.43             | 0.153        |
| Number of children in the classroom  | 1.04               | 0.03              | 0.97 – 1.11  | 1.05             | 0.295        |
| Observations                         | 81                 |                   |              |                  |              |
| R <sup>2</sup> Tjur                  | 0.203              |                   |              |                  |              |
| AIC                                  | 102.662            |                   |              |                  |              |

*Note. The second category corresponds to the reference category.*

Table S5. Effect of partner status on the number of gazes per second during the first trial while controlling for dyad characteristics (sex: Female-Female, Male-Male, Female-Male, mean age, age difference; LM).

| <b>Number of gazes per second</b>        |                             |      |               |                  |                  |
|------------------------------------------|-----------------------------|------|---------------|------------------|------------------|
| <i>Predictors</i>                        | <i>Estimates std. Error</i> |      | <i>CI</i>     | <i>Statistic</i> | <i>p</i>         |
| (Intercept)                              | 0.23                        | 0.03 | 0.17 – 0.28   | 8.41             | <b>&lt;0.001</b> |
| Partner: Friend vs. Kin                  | 0.10                        | 0.03 | 0.05 – 0.16   | 3.55             | <b>0.001</b>     |
| Partner: Non Friend vs. Kin              | 0.05                        | 0.03 | -0.00 – 0.11  | 1.93             | 0.056            |
| Partner: Non-friend vs. Friend           | -0.05                       | 0.02 | -0.10 – -0.00 | -2.09            | <b>0.038</b>     |
| Dyad age difference                      | 0.02                        | 0.01 | 0.00 – 0.05   | 2.04             | <b>0.043</b>     |
| Dyad mean age                            | 0.06                        | 0.01 | 0.04 – 0.08   | 5.20             | <b>&lt;0.001</b> |
| Dyad sex: FM vs. FF                      | 0.06                        | 0.03 | 0.00 – 0.11   | 2.07             | <b>0.041</b>     |
| Dyad sex: MM vs. FF                      | 0.03                        | 0.02 | -0.02 – 0.08  | 1.34             | 0.182            |
| Dyad sex: MM vs. FM                      | -0.02                       | 0.03 | -0.07 – 0.03  | -0.89            | 0.378            |
| Observations                             | 142                         |      |               |                  |                  |
| R <sup>2</sup> / R <sup>2</sup> adjusted | 0.261 / 0.228               |      |               |                  |                  |
| AIC                                      | -188.387                    |      |               |                  |                  |

*Note. The second category corresponds to the reference category.*

**Figure S1.**

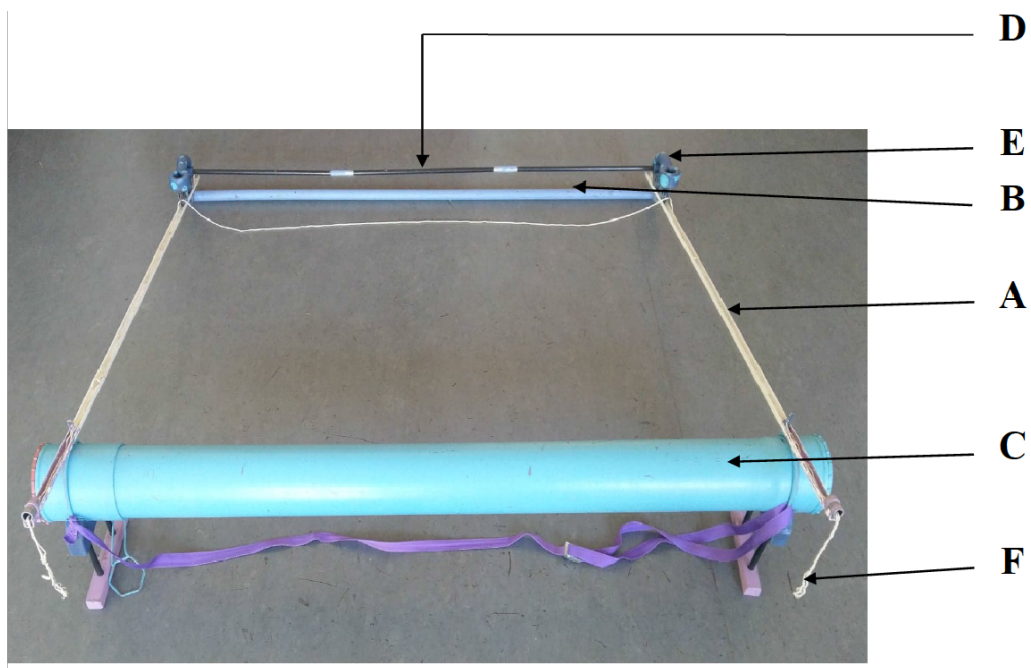

*Fig. S1. Photograph of the cooperation apparatus. The "rope pulling game" was adapted from previous studies on chimpanzees and children. It consisted of two rails (A) 150 cm long and spaced 145 cm apart attached to a metal rod (B) and a plastic tube (C). Two small metal trolleys (D) with casters were recessed on each of the rails and were connected to each other by a plastic rod (E). These two carriages had a cavity in which the reward (stickers) was placed. A 480 cm rope was threaded into different notches at the rail and trolleys in such a way that if only one of the children pulled on one end of the rope (F), the other end was automatically pulled in the rail out of reach of the second child. The rope extended the end of the apparatus by only 15 cm on each side so that one child could not pull on both ends alone. At each beginning test, the carriages were positioned on the far side of the metal rod (farthest from children). In order to access the stickers, the children had to simultaneously pull at each of the two ends of the rope and thus roll the carriages towards them to the tube. The rails were inclined at an angle of 30° so that the carriages went back if one of the two children let go of the rope.*

**Figure S2.**

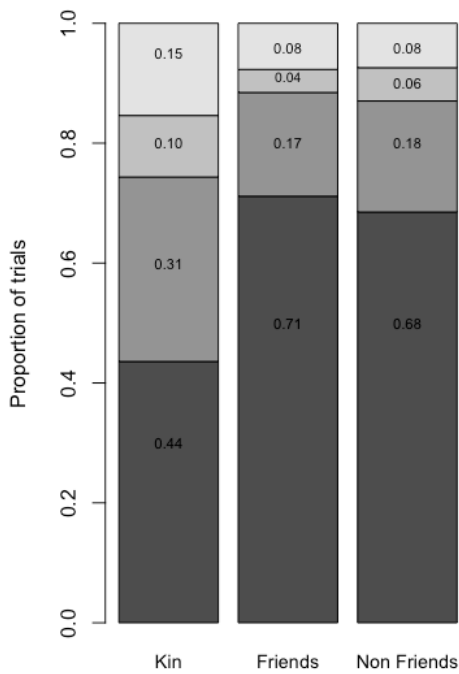

*Fig. S2. Proportion of successful attempts during first trials (dark grey), second trials (middle grey), and third trials (light grey) or failure during the third trial (very light grey) by partner status (Kin, Friends, Non-Friends). Kin dyads required more trials to succeed on average compared to friends or non-friend dyads (See Table S1 for detailed statistics).*



**Figure S3**

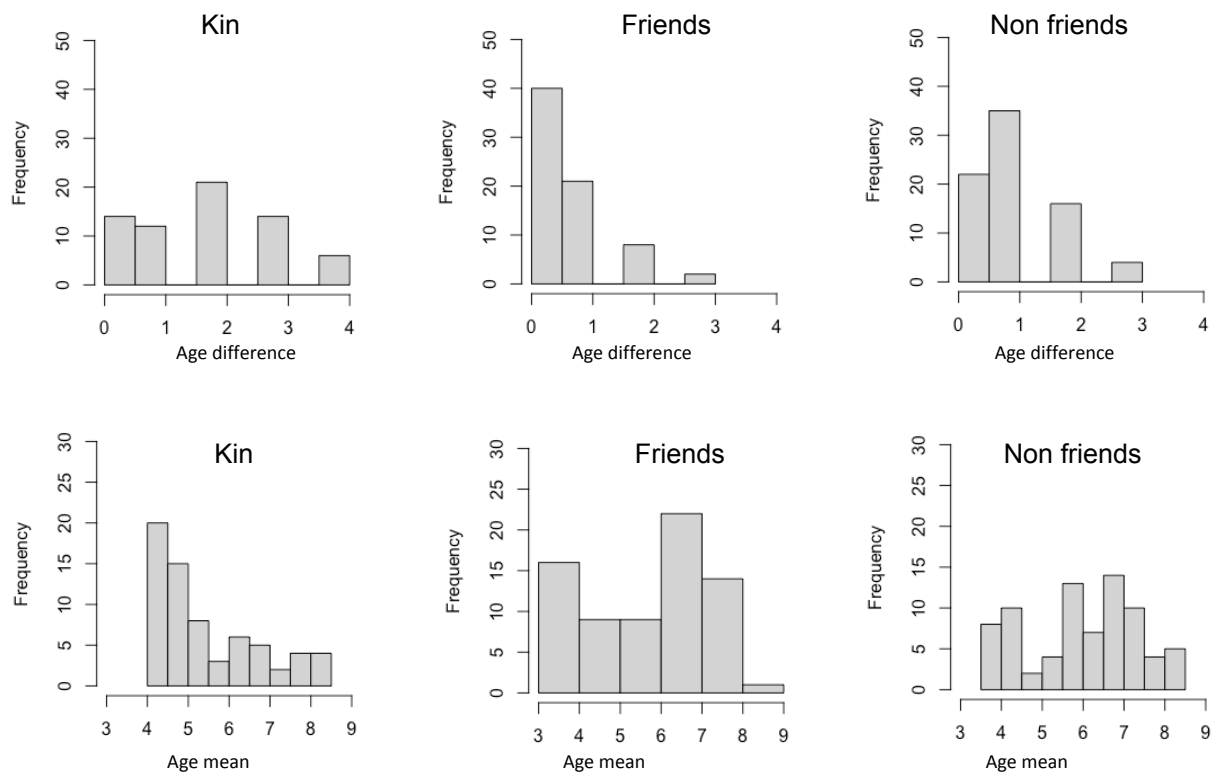

*Fig. S3. Histograms of the age difference between members of the dyad (top row) and mean age of dyad members (bottom row) for each dyad status (i.e. Kin, friends and non-friends).*

**Figure S4.**

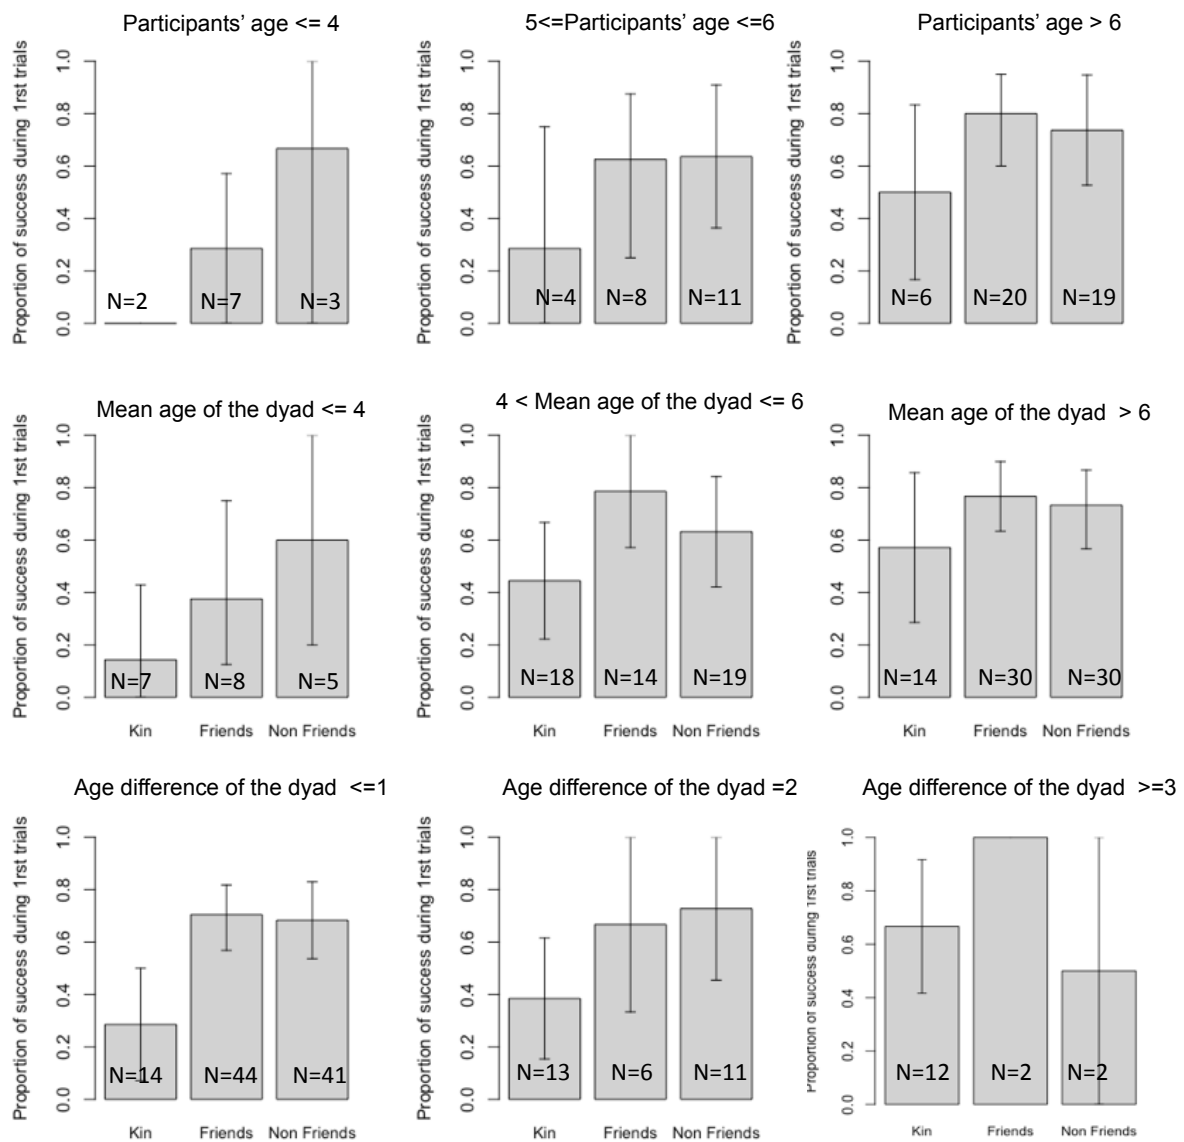

*Fig. S4. Proportion of successful first trials by kin (i.e. siblings), non-kin friends, and non-kin non-friend dyads in cooperative rope pulling by age groups (age:  $\leq 4$  years old; between 4 and 6 years-old; and  $> 6$ ), mean age of the dyad ( $\leq 4$ ; 5 and 6 and  $> 6$ ) and age difference ( $\leq 1$ ; 2 or  $> 3$ ). Error bars indicate 95% bootstrapped confidence interval. N values indicate the number of dyads in each category. When the sample size is sufficient, kin partners are always less successful than non-kin partners (friends or non-friends).*

**Figure S5.**

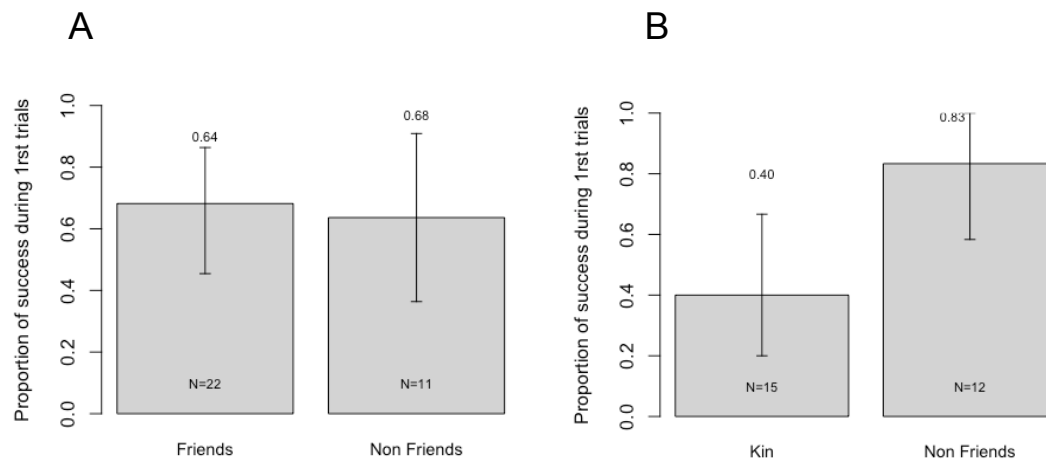

*Fig. S5. Proportion of successful first trials in the rope pulling task using data restricted to groups that have similar age and gender profiles. A) Contrast between dyads that include friends or non-friends including only dyads composed of same-age (age difference  $<1$ ) and same-sex (Female-Female and Male-Male) individuals. Performance during first trials of the friend and non-friend dyads do not differ (Odds ratios: 1.75; CI: [0.25-5.59];  $z=0.26$ ;  $P=0.80$ ) as in the overall analysis presented in the main text (see also Table S2). B) Contrast between kin and non-friend dyads where ages are different (age difference  $\geq 1$  since kin are more often more than one year apart) and different-sex (Female-Male). As friend dyads were nearly always the same age, we only contrasted non-friends with kin to keep the age difference similar. Kin dyads performed less well than non-friends in the different age different, gender group (Odds ratios: 0.13; CI: [0.02-0.73],  $z=-2.15$ ;  $P=0.032$ ) as was observed in the overall results presented in the main text (see also Table S2). Figures show means and error bars indicate 95% bootstrapped confidence interval. N values indicate the number of dyads in each category.*

**Figure S6.**

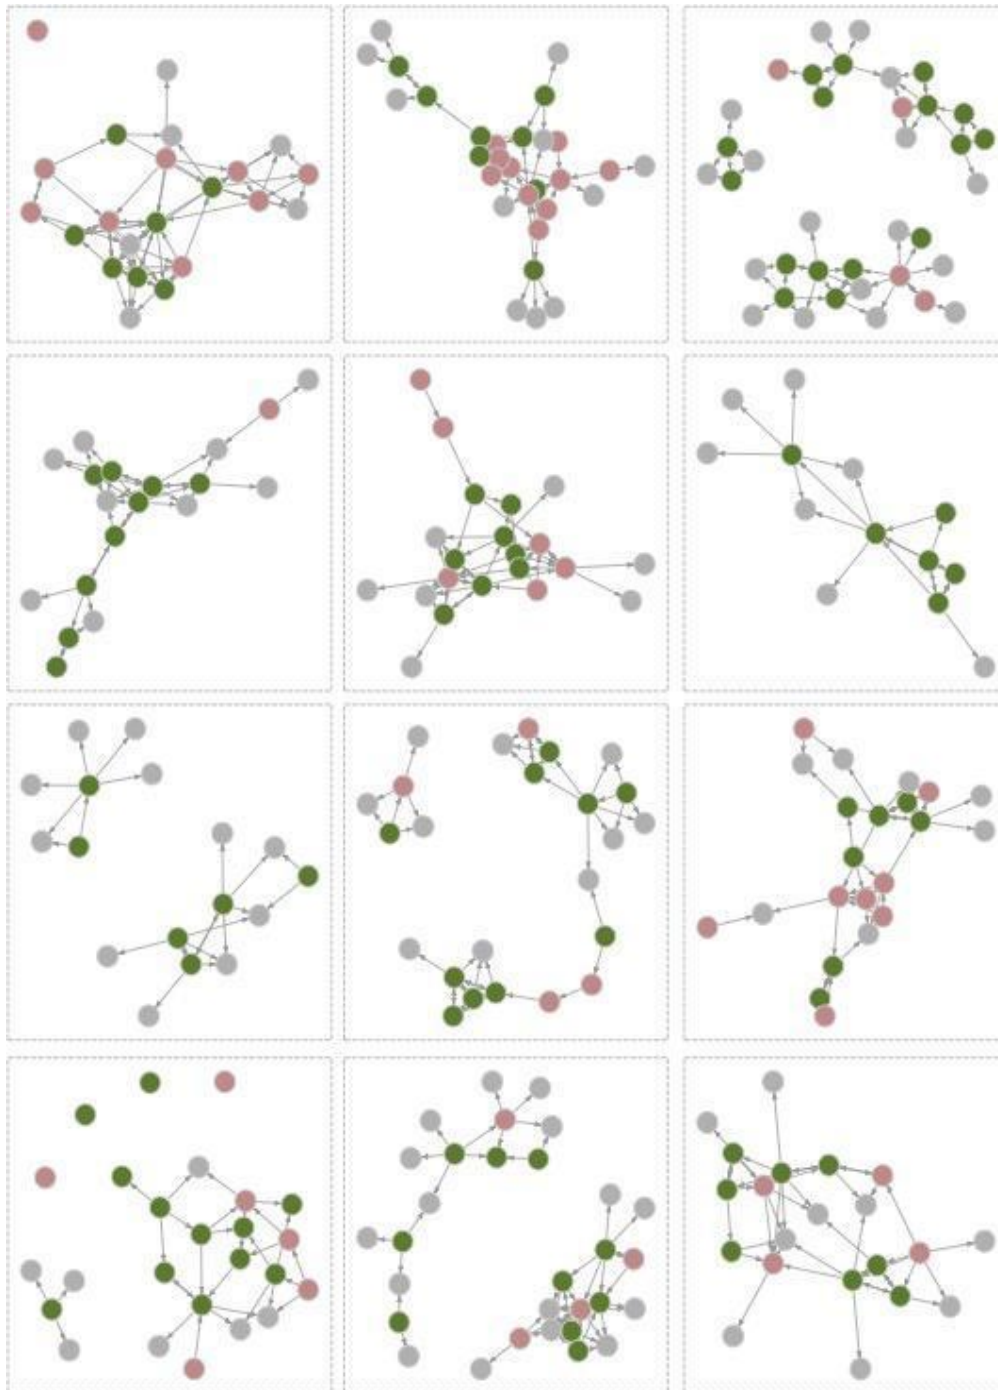

*Fig. S6. Network graphs representing relationships between children in 10 schools (12 classrooms) where data was available based on questionnaire data from children who participated in the task. Individuals who were successful in the first trial are shown in green while those who failed in the first trial are shown in red. Children who did not participate but who participants named as friends appear in grey. Arrows represent friendship between children such that bi-directional arrows represent pairs of individuals who each listed the other as a friend whereas single headed arrows represent cases where one individual considered the other a friend while the second individual did not list the first as a friend.*

**Figure S7.**

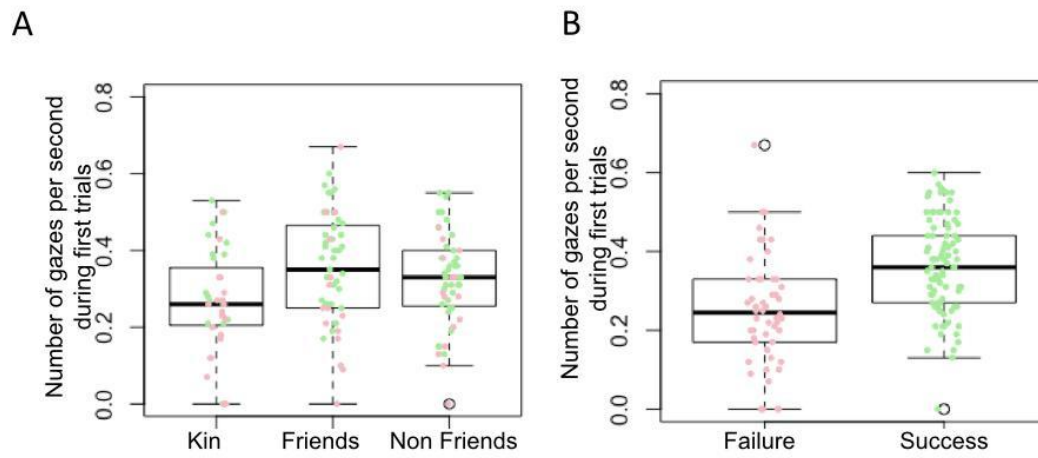

*Fig. S7. Number of gazes displayed during the first trials. A) Boxplots represent the number of gazes per second for each dyad category (i.e. Kin, friends and non-friends). Each dot represents a dyad with red dots associated with failure and green dots associated with joint success.*
